# Supplementary material
Source: PubMed Central journal article supplement (PMC8093319)
Supplement: NIHMS1645005-supplement-Supplemental_Digital_Content_1.pdf [file NIHMS1645005-supplement-Supplemental_Digital_Content_1.pdf]

# Chest Wall Data Collection

---

Record ID

---

---

Institution

---

---

Date of diagnosis

---

---

Age at diagnosis (year)

---

---

Treatment of primary chest wall lesion (click all that apply)

- Surgical excision  
 Chemotherapy  
 Radiation

---

Tumor type

- Osteosarcoma  
 Ewing Sarcoma  
 Rhabdomyosarcoma  
 Other soft tissue sarcoma

---

Please give diagnosis

---

---

Tumor side

- Right  
 Left

---

Location of tumor on rib

- Anterior  
 Middle  
 Posterior

---

Rib number

- 1 to 3  
 4 to 8  
 9 to 12

---

Radiation (initial dose only)

- Preoperative  
 Postoperative  
 Both  
 Definitive radiation without surgery

---

Total radiation dose

---

---

Timing of surgery

- Upfront  
 After Neoadjuvant Chemotherapy  
 Other or none

---

Number of ribs resected (total or partial)

---

---

Number of ribs completely resected

---

---

Number of ribs partially resected

---

---

Margins

- R0  
 R1  
 R2
- 

---

Initial reconstruction material

- None  
 Muscle Flap  
 Mesh (marlex dacron etc)  
 Biologic mesh  
 Methyl methacrylate (+/- mesh)
- 

---

Local recurrence?

- Yes  
 No  
 Unknown
- 

---

Recurrence date

---

---

Chest reoperation performed

- Yes  
 No
- 

---

Type

- Oncologic Resection  
 Additional Reconstruction  
 Procedure for complication (e.g. infection)
- 

---

Describe

---

---

Date of reoperation

---

---

Death

- Yes  
 No  
 Unknown
- 

---

Date of death

---

---

Scoliosis

- Yes  
 No  
 Unknown
- 

---

Cobb angle (most recent)

---

---

Cobb angle date

---

---

Scoliosis surgery

- Yes  
 No  
 Unknown
- 

---

Date of most recent follow up

---
