# Supplementary material
Source: PubMed Central journal article supplement (PMC8093319)
Supplement: NIHMS1645005-supplement-Supplemental_Digital_Content_2.pdf [file NIHMS1645005-supplement-Supplemental_Digital_Content_2.pdf]

### Pediatric Profile– 37

Please respond to each question or statement by marking one box per row.

| <b><u>Physical Function Mobility</u></b> |                                                                     |                               |                               |                               |                               |                               |
|------------------------------------------|---------------------------------------------------------------------|-------------------------------|-------------------------------|-------------------------------|-------------------------------|-------------------------------|
| <b>In the past 7 days...</b>             |                                                                     | <b>With no trouble</b>        | <b>With a little trouble</b>  | <b>With some trouble</b>      | <b>With a lot of trouble</b>  | <b>Not able to do</b>         |
| 235R1r                                   | I could do sports and exercise that other kids my age could do..... | <input type="checkbox"/><br>5 | <input type="checkbox"/><br>4 | <input type="checkbox"/><br>3 | <input type="checkbox"/><br>2 | <input type="checkbox"/><br>1 |
| 4124R1r                                  | I could get up from the floor .....                                 | <input type="checkbox"/><br>5 | <input type="checkbox"/><br>4 | <input type="checkbox"/><br>3 | <input type="checkbox"/><br>2 | <input type="checkbox"/><br>1 |
| 2707R2r                                  | I could walk up stairs without holding on to anything.....          | <input type="checkbox"/><br>5 | <input type="checkbox"/><br>4 | <input type="checkbox"/><br>3 | <input type="checkbox"/><br>2 | <input type="checkbox"/><br>1 |
| 5023R1r                                  | I have been physically able to do the activities I enjoy most ..... | <input type="checkbox"/><br>5 | <input type="checkbox"/><br>4 | <input type="checkbox"/><br>3 | <input type="checkbox"/><br>2 | <input type="checkbox"/><br>1 |
| 236R1r                                   | I could keep up when I played with other kids .....                 | <input type="checkbox"/><br>5 | <input type="checkbox"/><br>4 | <input type="checkbox"/><br>3 | <input type="checkbox"/><br>2 | <input type="checkbox"/><br>1 |
| 4185R1r                                  | I could stand up on my tiptoes .....                                | <input type="checkbox"/><br>5 | <input type="checkbox"/><br>4 | <input type="checkbox"/><br>3 | <input type="checkbox"/><br>2 | <input type="checkbox"/><br>1 |
| <b><u>Anxiety</u></b>                    |                                                                     |                               |                               |                               |                               |                               |
| <b>In the past 7 days...</b>             |                                                                     | <b>Never</b>                  | <b>Almost Never</b>           | <b>Sometimes</b>              | <b>Often</b>                  | <b>Almost Always</b>          |
| 2220R2r                                  | I felt like something awful might happen...                         | <input type="checkbox"/><br>1 | <input type="checkbox"/><br>2 | <input type="checkbox"/><br>3 | <input type="checkbox"/><br>4 | <input type="checkbox"/><br>5 |
| 713R1r                                   | I felt nervous.....                                                 | <input type="checkbox"/><br>1 | <input type="checkbox"/><br>2 | <input type="checkbox"/><br>3 | <input type="checkbox"/><br>4 | <input type="checkbox"/><br>5 |
| 5044R1r                                  | I felt worried.....                                                 | <input type="checkbox"/><br>1 | <input type="checkbox"/><br>2 | <input type="checkbox"/><br>3 | <input type="checkbox"/><br>4 | <input type="checkbox"/><br>5 |
| 3459bR1r                                 | I worried when I was at home .....                                  | <input type="checkbox"/><br>1 | <input type="checkbox"/><br>2 | <input type="checkbox"/><br>3 | <input type="checkbox"/><br>4 | <input type="checkbox"/><br>5 |
| 227bR1r                                  | I felt scared .....                                                 | <input type="checkbox"/><br>1 | <input type="checkbox"/><br>2 | <input type="checkbox"/><br>3 | <input type="checkbox"/><br>4 | <input type="checkbox"/><br>5 |
| 3150bR2r                                 | I worried when I went to bed at night .....                         | <input type="checkbox"/><br>1 | <input type="checkbox"/><br>2 | <input type="checkbox"/><br>3 | <input type="checkbox"/><br>4 | <input type="checkbox"/><br>5 |
| <b><u>Depressive Symptoms</u></b>        |                                                                     |                               |                               |                               |                               |                               |
| <b>In the past 7 days...</b>             |                                                                     | <b>Never</b>                  | <b>Almost Never</b>           | <b>Sometimes</b>              | <b>Often</b>                  | <b>Almost Always</b>          |
| 5041R1r                                  | I felt everything in my life went wrong.....                        | <input type="checkbox"/><br>1 | <input type="checkbox"/><br>2 | <input type="checkbox"/><br>3 | <input type="checkbox"/><br>4 | <input type="checkbox"/><br>5 |
| 711R1r                                   | I felt lonely .....                                                 | <input type="checkbox"/><br>1 | <input type="checkbox"/><br>2 | <input type="checkbox"/><br>3 | <input type="checkbox"/><br>4 | <input type="checkbox"/><br>5 |
| 228R1r                                   | I felt sad .....                                                    | <input type="checkbox"/><br>1 | <input type="checkbox"/><br>2 | <input type="checkbox"/><br>3 | <input type="checkbox"/><br>4 | <input type="checkbox"/><br>5 |

**Depressive Symptoms**  
**In the past 7 days...**

|          | Never                         | Almost Never                  | Sometimes                     | Often                         | Almost Always                 |
|----------|-------------------------------|-------------------------------|-------------------------------|-------------------------------|-------------------------------|
| 3952aR2r | <input type="checkbox"/><br>1 | <input type="checkbox"/><br>2 | <input type="checkbox"/><br>3 | <input type="checkbox"/><br>4 | <input type="checkbox"/><br>5 |
| 488R1r   | <input type="checkbox"/><br>1 | <input type="checkbox"/><br>2 | <input type="checkbox"/><br>3 | <input type="checkbox"/><br>4 | <input type="checkbox"/><br>5 |
| 5035R1r  | <input type="checkbox"/><br>1 | <input type="checkbox"/><br>2 | <input type="checkbox"/><br>3 | <input type="checkbox"/><br>4 | <input type="checkbox"/><br>5 |

**Fatigue**  
**In the past 7 days...**

|          | Never                         | Almost Never                  | Sometimes                     | Often                         | Almost Always                 |
|----------|-------------------------------|-------------------------------|-------------------------------|-------------------------------|-------------------------------|
| 4239aR2r | <input type="checkbox"/><br>1 | <input type="checkbox"/><br>2 | <input type="checkbox"/><br>3 | <input type="checkbox"/><br>4 | <input type="checkbox"/><br>5 |
| 2876R1r  | <input type="checkbox"/><br>1 | <input type="checkbox"/><br>2 | <input type="checkbox"/><br>3 | <input type="checkbox"/><br>4 | <input type="checkbox"/><br>5 |
| 4241R2r  | <input type="checkbox"/><br>1 | <input type="checkbox"/><br>2 | <input type="checkbox"/><br>3 | <input type="checkbox"/><br>4 | <input type="checkbox"/><br>5 |
| 4196R1r  | <input type="checkbox"/><br>1 | <input type="checkbox"/><br>2 | <input type="checkbox"/><br>3 | <input type="checkbox"/><br>4 | <input type="checkbox"/><br>5 |
| 4213R1r  | <input type="checkbox"/><br>1 | <input type="checkbox"/><br>2 | <input type="checkbox"/><br>3 | <input type="checkbox"/><br>4 | <input type="checkbox"/><br>5 |
| 4221R1r  | <input type="checkbox"/><br>1 | <input type="checkbox"/><br>2 | <input type="checkbox"/><br>3 | <input type="checkbox"/><br>4 | <input type="checkbox"/><br>5 |

**Peer Relationships**  
**In the past 7 days...**

|         | Never                         | Almost Never                  | Sometimes                     | Often                         | Almost Always                 |
|---------|-------------------------------|-------------------------------|-------------------------------|-------------------------------|-------------------------------|
| 5018R1r | <input type="checkbox"/><br>1 | <input type="checkbox"/><br>2 | <input type="checkbox"/><br>3 | <input type="checkbox"/><br>4 | <input type="checkbox"/><br>5 |
| 5058R1r | <input type="checkbox"/><br>1 | <input type="checkbox"/><br>2 | <input type="checkbox"/><br>3 | <input type="checkbox"/><br>4 | <input type="checkbox"/><br>5 |
| 5055R1r | <input type="checkbox"/><br>1 | <input type="checkbox"/><br>2 | <input type="checkbox"/><br>3 | <input type="checkbox"/><br>4 | <input type="checkbox"/><br>5 |
| 233R2r  | <input type="checkbox"/><br>1 | <input type="checkbox"/><br>2 | <input type="checkbox"/><br>3 | <input type="checkbox"/><br>4 | <input type="checkbox"/><br>5 |
| 1147R1r | <input type="checkbox"/><br>1 | <input type="checkbox"/><br>2 | <input type="checkbox"/><br>3 | <input type="checkbox"/><br>4 | <input type="checkbox"/><br>5 |
| 210R1r  | <input type="checkbox"/><br>1 | <input type="checkbox"/><br>2 | <input type="checkbox"/><br>3 | <input type="checkbox"/><br>4 | <input type="checkbox"/><br>5 |

**Pain Interference**  
**In the past 7 days...**

|         | Never                         | Almost Never                  | Sometimes                     | Often                         | Almost Always                 |
|---------|-------------------------------|-------------------------------|-------------------------------|-------------------------------|-------------------------------|
| 3793R1r | <input type="checkbox"/><br>1 | <input type="checkbox"/><br>2 | <input type="checkbox"/><br>3 | <input type="checkbox"/><br>4 | <input type="checkbox"/><br>5 |
| 9004r   | <input type="checkbox"/><br>1 | <input type="checkbox"/><br>2 | <input type="checkbox"/><br>3 | <input type="checkbox"/><br>4 | <input type="checkbox"/><br>5 |

**Pain Interference**  
**In the past 7 days...**

|         |                                                            | Never                         | Almost<br>Never               | Sometimes                     | Often                         | Almost<br>Always              |
|---------|------------------------------------------------------------|-------------------------------|-------------------------------|-------------------------------|-------------------------------|-------------------------------|
| 2045R1r | It was hard for me to run when I had pain ...              | <input type="checkbox"/><br>1 | <input type="checkbox"/><br>2 | <input type="checkbox"/><br>3 | <input type="checkbox"/><br>4 | <input type="checkbox"/><br>5 |
| 2049R1r | It was hard for me to walk one block when I had pain ..... | <input type="checkbox"/><br>1 | <input type="checkbox"/><br>2 | <input type="checkbox"/><br>3 | <input type="checkbox"/><br>4 | <input type="checkbox"/><br>5 |
| 1703R1r | It was hard to have fun when I had pain.....               | <input type="checkbox"/><br>1 | <input type="checkbox"/><br>2 | <input type="checkbox"/><br>3 | <input type="checkbox"/><br>4 | <input type="checkbox"/><br>5 |
| 2180R1r | It was hard to stay standing when I had pain .....         | <input type="checkbox"/><br>1 | <input type="checkbox"/><br>2 | <input type="checkbox"/><br>3 | <input type="checkbox"/><br>4 | <input type="checkbox"/><br>5 |

**Pain Intensity**  
**In the past 7 days...**

|        |                                      |                          |                          |                          |                          |                          |                          |                          |                          |                          |                          |                                      |
|--------|--------------------------------------|--------------------------|--------------------------|--------------------------|--------------------------|--------------------------|--------------------------|--------------------------|--------------------------|--------------------------|--------------------------|--------------------------------------|
| 9033R1 | How bad was your pain on average? .. | <input type="checkbox"/> |                                      |
|        |                                      | 0                        | 1                        | 2                        | 3                        | 4                        | 5                        | 6                        | 7                        | 8                        | 9                        | 10                                   |
|        |                                      | No<br>pain               |                          |                          |                          |                          |                          |                          |                          |                          |                          | Worst<br>pain<br>you can<br>think of |
